# Supplementary material for: Himalayan Ficus palmata L. Fruit Extract Showed In Vivo Central and Peripheral Analgesic Activity Involving COX-2 and Mu Opioid Receptors
Source: MDPI journal article supplement (doi:10.3390/plants10081685), 2021-08-16
Supplement: s1 [file s1]

Supplementary material

# Himalayan *Ficus palmata* L. Fruit Extract Showed In Vivo Central and Peripheral Analgesic Activity Involving COX-2 and Mu Opioid Receptors

Table S1. Gradient conditions of the mobile phase for HPLC.

| Time  | Flow Rate | % of solvent A | % of Solvent B |
|-------|-----------|----------------|----------------|
| 0.01  | 1.5       | 75             | 25             |
| 18.00 | 1.5       | 50             | 50             |
| 25.01 | 1.5       | 25             | 75             |
| 32.0  | 1.5       | 20             | 80             |
| 35.0  | 1.5       | 50             | 50             |
| 40.0  | 1.5       | 75             | 25             |
| 45.0  | 1.5       | 75             | Stop           |

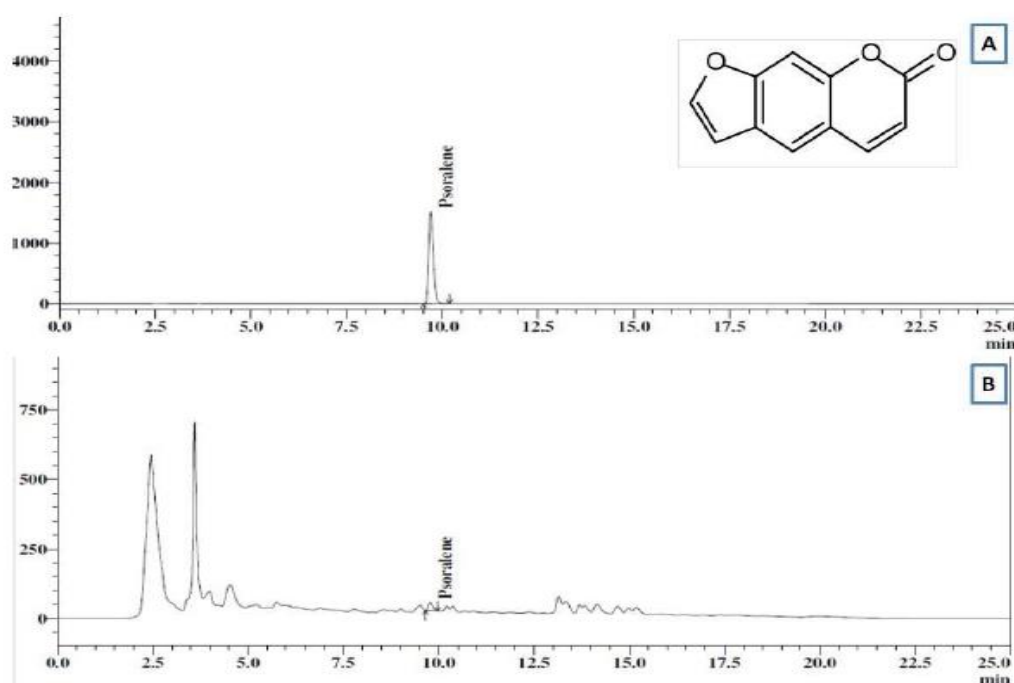

Figure S1. RP-HPLC chromatogram of psoralen standard (A) and psoralen identified in *F. palmata* sample (B).
